# Supplementary material for: Coupling the recombineering to Cre-lox system enables simplified large-scale genome deletion in Lactobacillus casei
Source: PubMed Central journal article supplement (PMC5808424; doi:10.1186/s12934-018-0872-4), 2018-02-12
Supplement: 12934_2018_872_MOESM1_ESM.pdf [file 12934_2018_872_MOESM1_ESM.pdf]

**Manuscript title: Coupling the recombineering to Cre-lox system  
enables simplified large-scale genome deletion in *Lactobacillus casei***

Yongping Xin<sup>1</sup>, Tingting Guo<sup>1</sup>, Yingli Mu<sup>1</sup>, Jian Kong<sup>1\*</sup>

<sup>1</sup>State Key Laboratory of Microbial Technology, Shandong University, Jinan 250100, P. R. China

\*To whom correspondence should be addressed. Tel: [+86 531 88362318]; Fax: [+86 531 88565234]; E-mail:  
[kongjian@sdu.edu.cn].

Present Address: [Jian Kong], State Key Laboratory of Microbial Technology, Shandong University,  
Jinan 250100, P. R. China

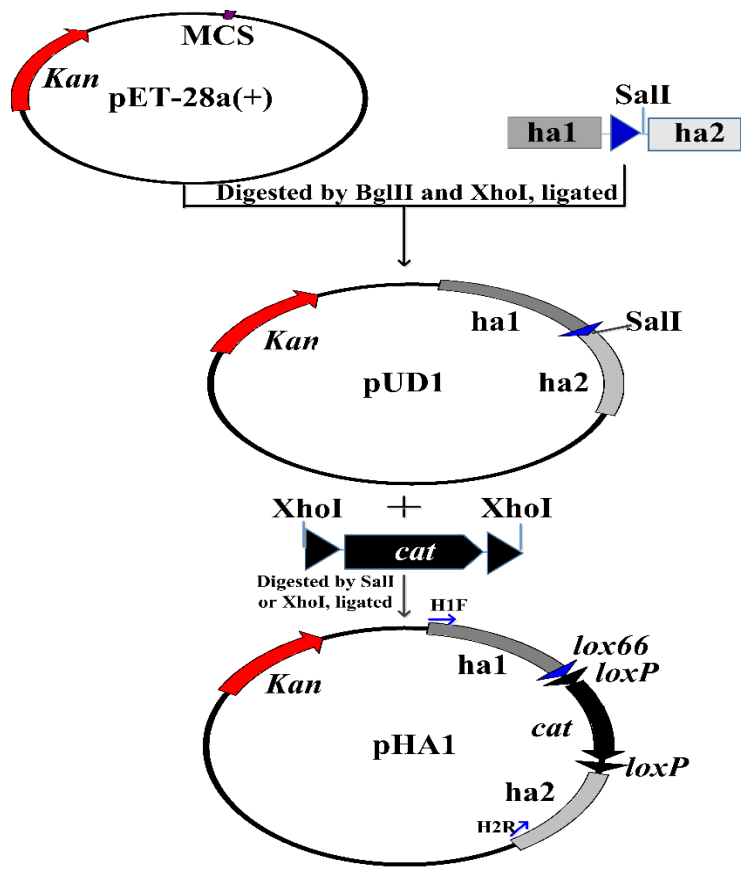

Figure S1. Strategies for obtaining linear donor disruption cassette H1-lox66-loxP-cat-loxP-H2.

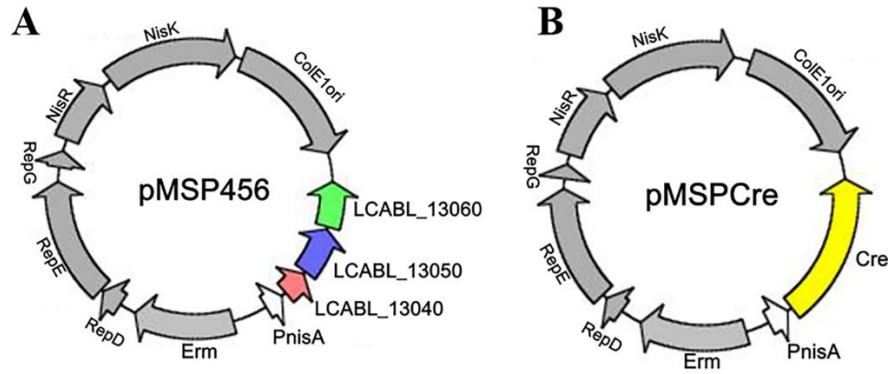

Figure S2. Structure of plasmids used in this study. Arrow heads show genes and their direction. (A) LCABL\_13040-50-60-expression plasmid pMSP456. (B) Cre-expression plasmid pMSPCre. LCABL\_13040-50-60 and Cre were transcribed from PnisA that is controlled by the product of nisin.

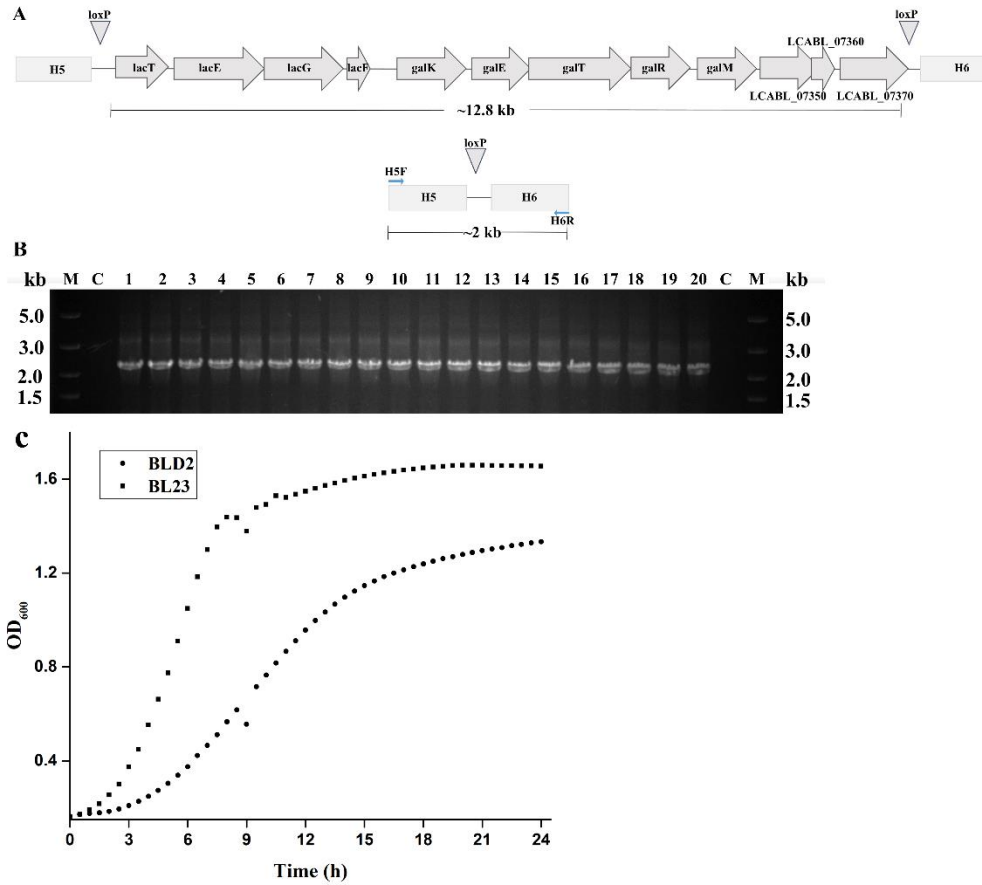

Figure S3. Deletion of large-scale genome region containing important gene(s) in *L. casei* BL23. (A) Layout and genetic context of the ~12.8 kb genome region and the size of PCR products amplified with primers H1F and H2R from BLD2 strains. (B) Colony PCR results. M: DNA marker; C: wild-type strain; 1–20: chloramphenicol resistance colonies. (C) Growth of *L. casei* BL23 and the deletion strain *L. casei* BLD2 on MRS.

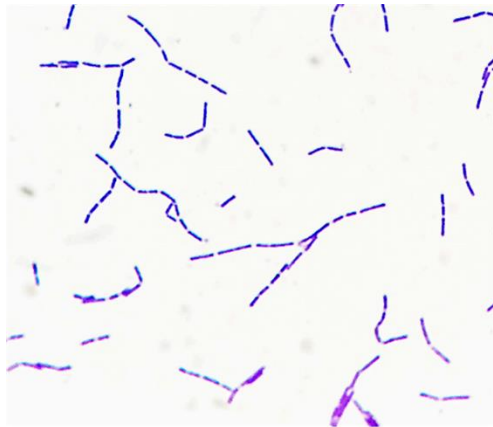

*Lactobacillus casei* BL23

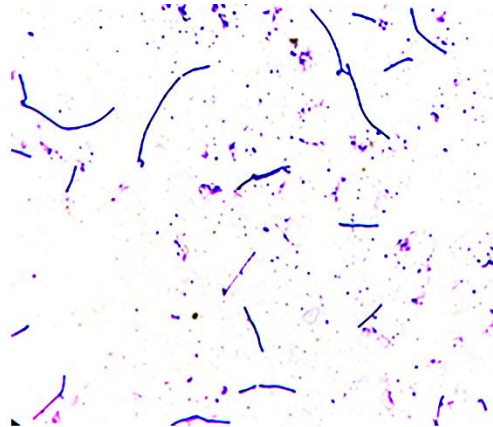

*Lactobacillus casei* BLD2

Figure S4. Cellular morphologies of *L. casei* strains BL23 and BLD2.

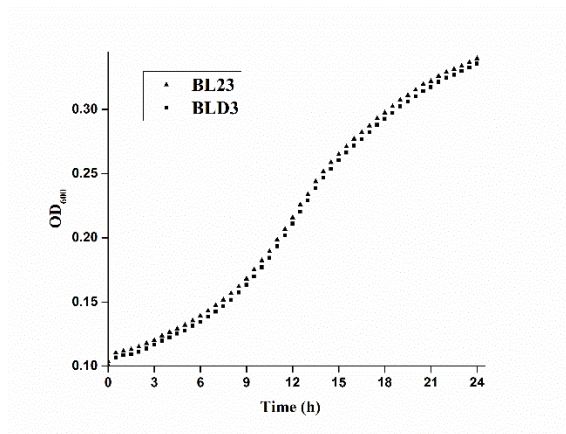

Figure S5. Growth of *L. casei* BL23 and the deletion strain *L. casei* BLD3 on CDM medium containing galactose.
